# Supplementary material for: The feature enhancement method of artistic images based on histogram equalization and bilateral filtering
Source: PeerJ Comput Sci. 2024 Jun 5;10:e2109. doi: 10.7717/peerj-cs.2109 (PMC11637003; doi:10.7717/peerj-cs.2109)
Supplement: Supplemental Information 1 [file peerj-cs-10-2109-s001.xlsx]

## Sheet: Sayfa1
Number of Tests	Method of this paper	Method of Reference 5	Method of Reference 6	Original Image
1	0.05	0.05	0.04	0.09
2	0.11	0.24	0.1	0.15
3	0.21	0.42	0.15	0.16
4	0.36	0.5	0.215	0.14
5	0.756	0.503	0.21	0.17
6	0.755	0.508	0.2	0.15
7	0.769	0.511	0.19	0.18
8	0.752	0.513	0.18	0.16
9	0.754	0.517	0.17	0.23
10	0.753	0.521	0.19	0.19
11	0.749	0.529	0.223	0.21
12	0.741	0.533	0.234	0.18
13	0.735	0.54	0.245	0.2
14	0.719	0.555	0.256	0.17
15	0.721	0.566	0.276	0.19
16	0.72	0.57	0.289	0.18
17	0.732	0.571	0.312	0.19
18	0.734	0.572	0.289	0.16
19	0.731	0.573	0.276	0.18
20	0.751	0.574	0.256	0.15
21	0.738	0.576	0.243	0.17
22	0.743	0.567	0.222	0.16
23	0.749	0.559	0.203	0.17
24	0.754	0.546	0.205	0.173
25	0.768	0.538	0.239	0.178
26	0.778	0.53	0.253	0.184
27	0.761	0.528	0.248	0.189
28	0.777	0.519	0.241	0.194
29	0.767	0.51	0.238	0.201
30	0.759	0.514	0.231	0.189
31	0.745	0.523	0.228	0.199
32	0.736	0.53	0.218	0.185
33	0.727	0.538	0.216	0.194
34	0.723	0.549	0.211	0.181
35	0.746	0.567	0.223	0.192
36	0.748	0.569	0.245	0.179
37	0.745	0.57	0.254	0.185
38	0.745	0.573	0.267	0.177
39	0.754	0.574	0.278	0.183
40	0.738	0.576	0.289	0.189
41	0.741	0.577	0.285	0.184
42	0.743	0.578	0.284	0.192
43	0.746	0.579	0.279	0.185
44	0.748	0.58	0.267	0.195
45	0.751	0.583	0.275	0.189
46	0.749	0.589	0.289	0.199
47	0.75	0.591	0.298	0.19
48	0.748	0.595	0.301	0.209
49	0.744	0.601	0.313	0.201
50	0.747	0.602	0.323	0.205
51	0.743	0.599	0.338	0.207
52	0.741	0.6	0.349	0.203
53	0.745	0.598	0.356	0.205
54	0.748	0.6	0.367	0.199
55	0.751	0.599	0.378	0.201
56	0.748	0.61	0.367	0.187
57	0.743	0.602	0.348	0.193
58	0.739	0.601	0.321	0.167
59	0.747	0.597	0.309	0.183
60	0.753	0.593	0.332	0.158
61	0.755	0.583	0.357	0.178
62	0.746	0.573	0.379	0.167
63	0.756	0.565	0.391	0.173
64	0.748	0.557	0.412	0.159
65	0.744	0.593	0.435	0.17
66	0.756	0.599	0.456	0.165
67	0.741	0.601	0.399	0.173
68	0.746	0.611	0.388	0.168
69	0.749	0.623	0.367	0.169
70	0.754	0.63	0.35	0.174
71	0.752	0.611	0.332	0.17
72	0.751	0.605	0.303	0.178
73	0.749	0.602	0.308	0.175
74	0.748	0.587	0.305	0.165
75	0.746	0.567	0.334	0.174
76	0.749	0.588	0.389	0.172
77	0.75	0.602	0.401	0.178
78	0.751	0.599	0.411	0.169
79	0.753	0.587	0.423	0.177
80	0.755	0.582	0.433	0.166
			1	2	3
		method 3	0.789	0.89	0.9
		method 5	0.456	0.678	0.69
		method4	0.423	0.505	0.569
		original	0.401	0.303	0.234
			1	2	3	4
		a	10	11	12	14
		b	4	5	2	7
		c	2	3	1	5
		d	1	2	1	3
